# Supplementary material for: Low voltage non-gassing electro-osmotic pump with zeta potential tuned aluminosilicate frits and organic dye electrodes
Source: Royal Society of Chemistry journal article supplement (doi:10.1039/c4ra04058a), 2014-01-01
Supplement: c4ra04058a1.pdf [file c4ra04058a1.pdf]

Supporting information

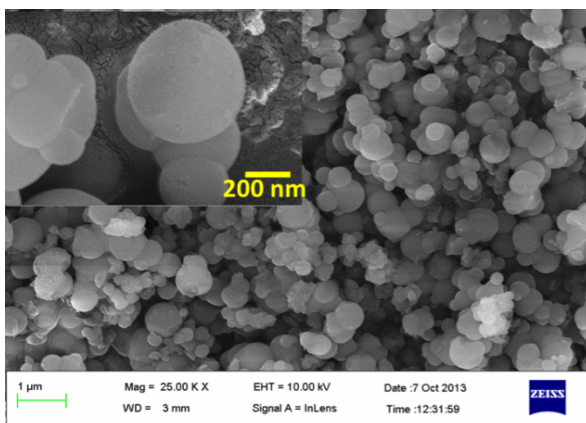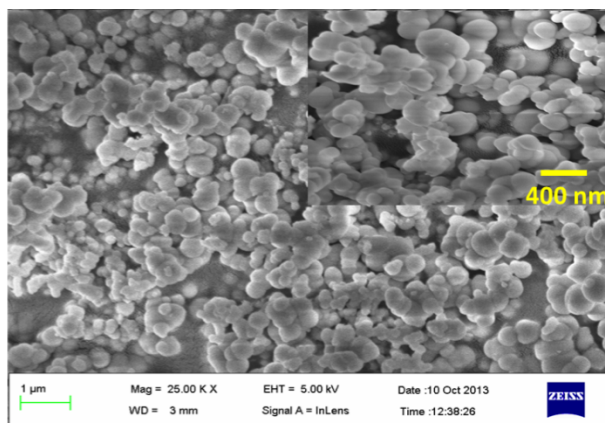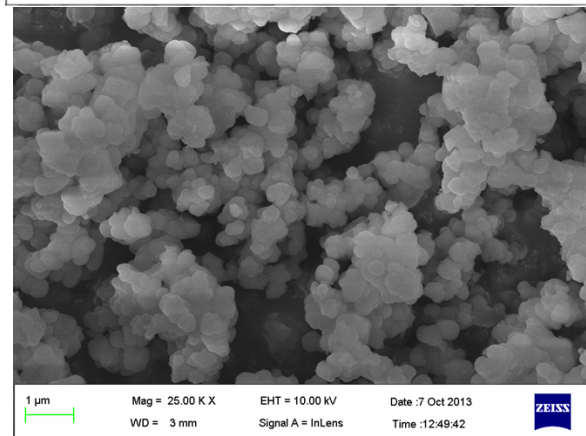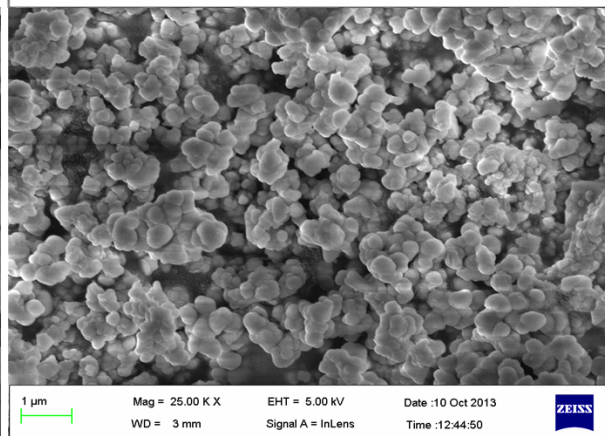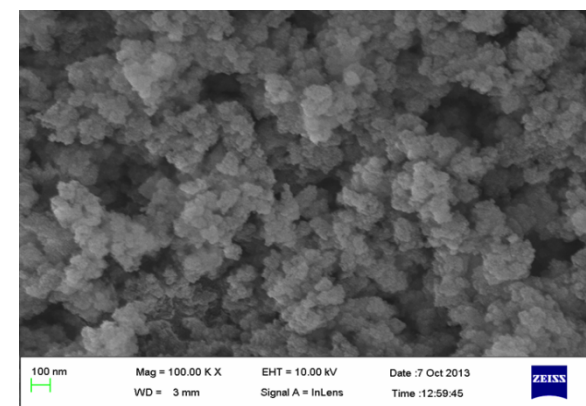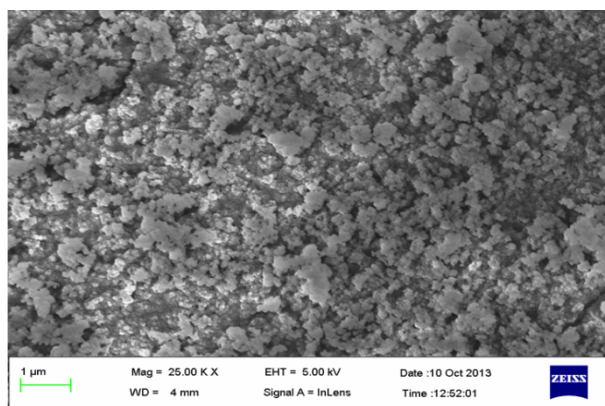

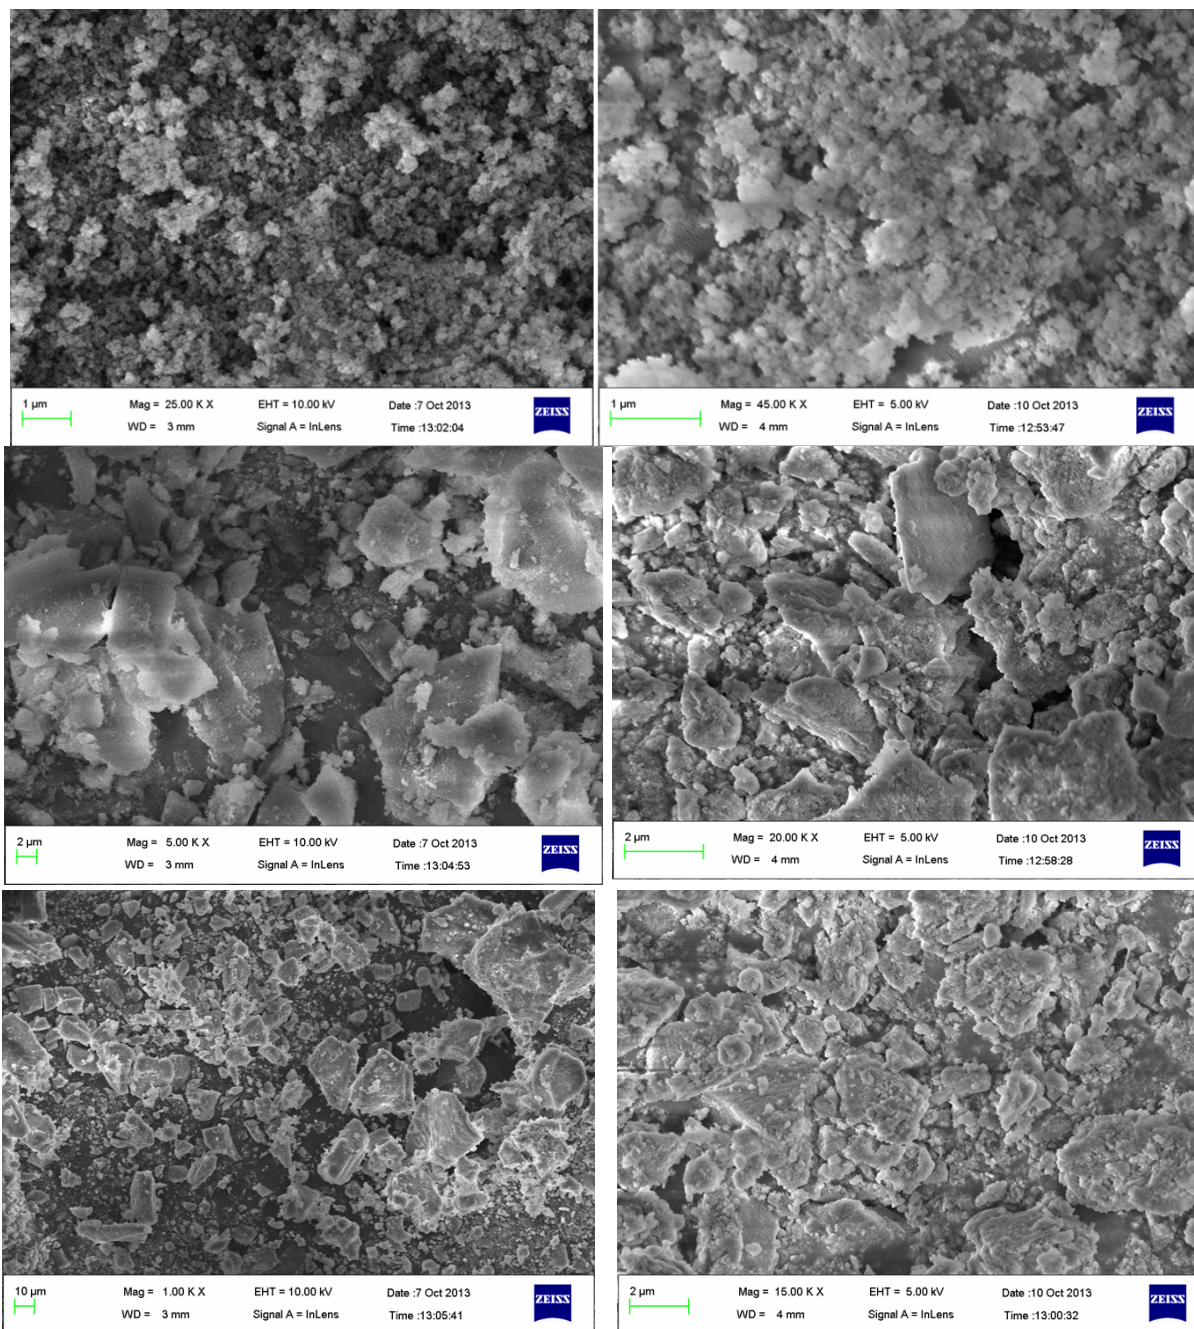

Fig. S1 SEM images of sub-micrometric silica particles doped with different concentrations of alumina. From left to right, particles are at 500 °C to 900 °C; top to bottom shows different concentration of alumina in silica particles, by row from the top (silica:alumina): (1:0.1), (1:0.25), (1:0.35), (1:0.5), (1:0.65), and (1:0.75).
